# Supplementary material for: Diatom Proteomics Reveals Unique Acclimation Strategies to Mitigate Fe Limitation
Source: PLoS One. 2013 Oct 16;8(10):e75653. doi: 10.1371/journal.pone.0075653 (PMC3797725; doi:10.1371/journal.pone.0075653)
Supplement: Table S6 — Spectral counts and Qspec statistics for proteins identified in all mass spectrometry experiments from the Amino Acid Metabolism pathways. (XLSX) [file pone.0075653.s008.xlsx]

## Sheet: Table_S6_Amino Acid Metabolism
Table S6. Spectral counts and Qspec statistics for proteins identified in all mass spectrometry experiments from the Amino Acid Metabolism pathways.
			Fe replete				Fe-limited				QSpec statistics			Fe-replete	Fe-limited	Graphical Illustration up/downregulated. KEY: upregulation in Fe-limited cells (red), downregulation in Fe-limited cells (blue)		AA metabolism: alanine apartate glutamate metabolism	AA metabolism: arginine and proline metabolism	AA metabolism: cysteine and methionine metabolism	AA metabolism: glycine , serine, and threonine metabolism	AA metabolism: histidine metabolism	AA metabolism: lysine biosynthesis	AA metabolism: lysine degradation	AA metabolism: phenylalanine metabolism	AA metabolism: phenylalanine, tyrosine, and tryptophan biosynthesis	AA metabolism: tryptophan metabolism	AA metabolism: tyrosine metabolism	AA metabolism: caline, leucine, and isoleucine degradation and biosynthesis
Protein Function	THAPS ID	Global ID Numbers	4 GPFs / replicate				4 GPFs / replicate				BayesFactor	Log2 fold change	significantly	Triplicates on VELOS
		REPLICATES:	1	2	3	4	1	2	3	4			up/down reg.	PAcIFIC	PAcIFIC		iPath	pathway
Glutamine synthase	jgi|Thaps3|270138|estExt_thaps1_ua_kg.C_chr_240003	224013245	78	75	76	80	44	53	44	52	11215.4	-0.456		69	57		K01915	X	X
putative S-adenosyl-L-homocysteinas protein	jgi|Thaps3|28496|estExt_Genewise1.C_chr_60082	224003341	25	17	20	18	19	24	28	26	1.424	0.184		38	53		K01251			X
carbamoyl-phosphate synthetase III; CPSase III	jgi|Thaps3|40323|estExt_gwp_gw1.C_chr_40316	223999327	19	20	27	28	23	21	21	23	0.517	-0.073		36	37		K01955	X	X
S-adenosyl methionine synthetase	jgi|Thaps3|21815|estExt_fgenesh1_pg.C_chr_30499	223998420	17	21	20	16	23	20	23	25	1.326	0.189		16	32		K00789			X
Ketol-acid reductoisomerase	jgi|Thaps3|23228|estExt_fgenesh1_pg.C_chr_60563	224003799	19	13	19	17	25	28	22	26	9.041	0.391		24	31		K00053												X
5-methyltetrahydrofolate:L-homocysteine S-methyltransferase	jgi|Thaps3|693|fgenesh1_pm.C_chr_12000003	224008322	3	1	1	3	2	3	3	1	0.734	0.102		17	27		K00548			X
glutamate synthase	jgi|Thaps3|29861|estExt_Genewise1.C_chr_130128	224009263	5	7	6	8	4	4	3	5	1.747	-0.423		19	26		K00265	X
3-isopropylmalate dehydratase (Isopropylmalate isomerase) (Alpha-IPM isomerase) (IPMI) >gi|1000692|dbj|BAA11052.1| LeuA	jgi|Thaps3|42704|estExt_gwp_gw1.C_chr_170167	224010930	9	9	7	7	10	7	10	7	0.555	0.045		17	26		K01703												X
2nd Hit Argininosuccinate synthase (Citrulline--aspartate ligase) >gi|4982360|gb|AAD36844.1| argininosuccinate synthase	jgi|Thaps3|42719|estExt_gwp_gw1.C_chr_180018	209583549	6	5	6	6	11	13	7	8	3.367	0.48		10	20		K01940	X	X
aspartate-ammonia ligase	jgi|Thaps3|24816|estExt_fgenesh1_pg.C_chr_140126	224009908	1	2	0	0	5	8	8	6	40.64	1.632	YES	12	19	1.632	K01914	X
hypothetical protein DDB0187034	jgi|Thaps3|10567|fgenesh1_pg.C_chr_17000030	224010752	4	3	2	2	3	6	2	6	1.084	0.343		15	19		K00820	X
3nd Hit:D-3-phosphoglycerate dehydrogenase	jgi|Thaps3|25130|estExt_fgenesh1_pg.C_chr_16a0073	224014248	13	13	9	8	7	7	9	3	3.056	-0.456		13	17		K00058				X
N-acetylornithine aminotransferase	jgi|Thaps3|270136|estExt_thaps1_ua_kg.C_chr_230045	224013082	2	1	4	2	6	8	6	7	28.154	0.914	YES	7	16	0.914	K00818		X				X
Isocitrate/isopropylmalate dehydrogenase	jgi|Thaps3|5293|fgenesh1_pg.C_chr_5000335	224001930	1	1	2	1	3	5	4	7	20.083	1.02	YES	9	16	1.02	K00052												X
hypothetical tryptophan synthase	jgi|Thaps3|25605|estExt_fgenesh1_pg.C_chr_200077	224012106	0	0	0	0	8	7	7	7	79.548	2.138	YES	6	16	2.138	K01696				X				X	X
ATP binding / isoleucine-tRNA ligase/ tRNA ligase	jgi|Thaps3|36339|e_gw1.10.18.1	224007929	5	3	1	3	3	4	2	1	0.813	-0.15		17	15		K01870												X
P-protein	jgi|Thaps3|39799|estExt_gwp_gw1.C_chr_30089	223998052	6	9	2	2	7	5	7	6	0.899	0.254		13	15		K00283				X
Oat-prov protein-ornithine aminotransferase	jgi|Thaps3|27892|estExt_Genewise1.C_chr_40321	224000259	5	8	8	8	11	8	6	7	0.624	0.085		10	14		K00819		X
OTC: ornithine transcarbamylase	jgi|Thaps3|997|fgenesh1_pg.C_chr_1000131	223993805	4	4	3	3	3	2	2	3	1.029	-0.254		10	14		K00611		X
homoserine dehydrogenase	jgi|Thaps3|40655|estExt_gwp_gw1.C_chr_50172	224000904	4	3	1	3	5	4	2	4	0.873	0.268		9	14		K00003			X	X		X
2-isopropylmalate synthase transferase	jgi|Thaps3|13393|gw1.1.130.1		5	4	3	4	11	10	9	7	24.387	0.728	YES	7	13	0.728	K01649												X
serine hydroxymethyltransferase	jgi|Thaps3|26031|estExt_fgenesh1_kg.C_chr_140007	224010070	2	3	0	1	8	7	4	6	22.714	1.138	YES	0	13	1.138	K00600				X
putative aminotransferase AGD2	jgi|Thaps3|31394|e_gw1.1.253.1	223992617	2	4	6	5	9	12	12	13	178.015	0.874	YES	6	12	0.874	K10206	X	X	X						X
asparagine synthetase	jgi|Thaps3|268718|estExt_thaps1_ua_kg.C_chr_40225	223999447	0	0	0	0	2	3	4	6	10.253	1.63	YES	4	12	1.63	K01953	X
valine-tRNA ligase	jgi|Thaps3|269966|estExt_thaps1_ua_kg.C_chr_180071	209583506	1	2	2	3	5	4	6	3	3.354	0.635		3	12		K01873												X
chloroplast O-acetyl-serine lyase	jgi|Thaps3|267987|estExt_thaps1_ua_kg.C_chr_10131	223992877	2	1	2	2	5	3	3	1	1.1	0.354		0	12		E2.5.1.47			X
hypothetical protein DDB0187034	jgi|Thaps3|39696|estExt_gwp_gw1.C_chr_20679	223995701	2	1	4	3	5	5	2	5	1.287	0.392		12	11		K00820	X
hydrolase/ nickel ion binding / urease	jgi|Thaps3|30193|estExt_Genewise1.C_chr_16a0021	224014054	2	2	2	2	1	1	1	1	1.147	-0.435		7	11		K01428		X
2nd Hit dihydroxy-acid dehydratase	jgi|Thaps3|27997|estExt_Genewise1.C_chr_40509	224000459	0	2	2	2	4	6	3	7	4.392	0.906		7	11		K01687												X
EMB2247; ATP binding / tRNA ligase/ valine-tRNA ligase	jgi|Thaps3|42971|estExt_gwp_gw1.C_chr_200117	224011916	0	0	0	0	1	1	1	2	1.764	1.037		6	11		E6.1.1.9												X
3nd Hit:chloroplast phytoene desaturase precursor	jgi|Thaps3|6524|fgenesh1_pg.C_chr_6000679		1	2	2	1	5	1	3	3	1.558	0.512		5	11		K02293												X
putative chloroplast cysteine synthase 1 precursor	jgi|Thaps3|31829|e_gw1.2.308.1		2	0	1	1	11	12	12	12	23443.3	1.869	YES	6	11	1.869	K01738			X
ferric leghemoglobin reductase-2 precursor	jgi|Thaps3|36716|e_gw1.11a.36.1	224013650	8	7	7	8	7	5	10	5	0.679	-0.074		8	11		K00382				X								X
3nd Hit:Spermidine/putrescine ABC transporter ATP-binding subunit	jgi|Thaps3|268970|estExt_thaps1_ua_kg.C_chr_50295	224001546	2	3	2	4	2	3	2	5	0.592	0.064		7	11		K00058				X
3nd Hit:diaminopimelate decarboxylase	jgi|Thaps3|20613|estExt_fgenesh1_pg.C_chr_10127	223993801	5	4	4	4	7	7	5	5	0.837	0.299		4	11		K01586						X
DHS2: DHS2 (3-DEOXY-D-ARABINO-HEPTULOSONATE 7-PHOSPHATE SYNTHASE); 3-deoxy-7-phosphoheptulonate synthase	jgi|Thaps3|2790|fgenesh1_pg.C_chr_2000745	223995587	2	1	1	0	4	5	3	5	7.072	1.075		5	11		K01626								X	X
glutamate dehydrogenase	jgi|Thaps3|26192|estExt_fgenesh1_pm.C_chr_40020	223999105	1	1	3	3	2	1	1	2	0.707	-0.2		5	10		E1.4.1.4	X	X
PREDICTED: similar to CG33123-PA	jgi|Thaps3|39979|estExt_gwp_gw1.C_chr_30471	223998496	0	0	0	0	2	0	0	3	2.145	0.982		0	10		K01869												X
MtrDRAFT_AC148918g29v2: Hydroxyacid dehydrogenase/reductase; 6-phosphogluconate dehydrogenase, C-terminal-like	jgi|Thaps3|2669|fgenesh1_pg.C_chr_2000624	223995479	0	0	0	0	2	2	3	3	3.503	1.398		3	9		E1.1.1.31												X
3nd Hit:Pyridine nucleotide-disulphide oxidoreductase, class I	jgi|Thaps3|24399|estExt_fgenesh1_pg.C_chr_11b0008	224013957	4	6	2	4	4	3	2	4	0.639	-0.177		7	9		E1.8.1.4				X								X
argininosuccinate lyase	jgi|Thaps3|29075|estExt_Genewise1.C_chr_80016	224005475	0	0	0	0	1	1	0	1	1.461	0.766		3	8		K01755	X	X
amidophosphoribosyltransferase	jgi|Thaps3|39075|estExt_gwp_gw1.C_chr_10298	223994077	0	0	0	0	0	1	0	0	1.06	0.321		0	8		K00764	X
acetylglutamate kinase	jgi|Thaps3|17214|gw1.3.528.1		7	6	4	2	9	9	9	8	3.418	0.539		4	8		K00930		X
N-acetyl-gamma-glutamyl-phosphate reductase	jgi|Thaps3|21290|estExt_fgenesh1_pg.C_chr_20420	223995245	4	1	3	2	6	5	8	4	5.347	0.691		0	8		K00145		X
Adeh_1156: arginine biosynthesis bifunctional protein ArgJ	jgi|Thaps3|2779|fgenesh1_pg.C_chr_2000734	306531018	0	0	0	0	4	2	3	5	6.987	1.592		2	8		K00620		X
diaminopimelate epimerase	jgi|Thaps3|36614|e_gw1.11a.77.1	224013704	0	1	0	0	3	4	4	5	6.358	1.52		0	8		K01778						X
glutamine synthetase	jgi|Thaps3|26051|estExt_fgenesh1_kg.C_chr_220004	224012585	0	0	0	0	2	3	2	2	3.032	1.341		3	7		K01915	X	X
NADH-glutamate synthase small chain	jgi|Thaps3|269160|estExt_thaps1_ua_kg.C_chr_60307	224003823	2	0	1	1	3	3	1	1	0.931	0.418		8	7		K00266	X
putative aldehyde dehydrogenase WIS1	jgi|Thaps3|38066|e_gw1.18.28.1	209583472	0	0	0	0	0	0	0	0	1	-0.002		2	7		E1.2.1.3		X			X		X			X
Pyruvate dehydrogenase (lipoamide)	jgi|Thaps3|16169|gw1.6.346.1	224003531	1	1	0	0	3	3	6	4	14.044	1.212	YES	0	7	1.212	E1.2.4.1												X
pyruvate dehydrogenase E1alpha subunit	jgi|Thaps3|268374|estExt_thaps1_ua_kg.C_chr_20386	223995699	1	0	0	2	0	1	1	1	0.621	0.025		6	7		K00161												X
-: chloroplast O-acetyl-serine lyase	jgi|Thaps3|1247|fgenesh1_pg.C_chr_1000381	223994047	0	0	1	1	1	2	2	3	1.37	0.783		2	7		E2.5.1.47			X
bifunctional aspartokinase/homoserine dehydrogenase I	jgi|Thaps3|29008|estExt_Genewise1.C_chr_70425	209586331	2	1	1	1	1	0	0	0	1.135	-0.735		2	7		K00003			X	X		X
3nd Hit:hypothetical protein	jgi|Thaps3|269704|estExt_thaps1_ua_kg.C_chr_130108	224009339	3	2	1	2	4	2	4	4	1.276	0.484		9	7		K01733				X
5th Best Hit: dihydrodipicolinate reductase	jgi|Thaps3|28544|estExt_Genewise1.C_chr_60152	224003431	0	0	0	0	0	0	0	1	1.012	0.334		7	7		E1.3.1.26						X
L-ascorbate peroxidase/ peroxidase	jgi|Thaps3|24572|estExt_fgenesh1_pg.C_chr_120356	224008654	1	3	3	3	4	3	1	3	0.738	0.051		3	7		E1.11.1.7
PREDICTED: similar to ankyrin repeat domain 28	jgi|Thaps3|24328|estExt_fgenesh1_pg.C_chr_11a0123	224013790	0	0	0	0	0	0	0	0	1	-0.002		2	7		E6.3.2.-										X
ADSS	jgi|Thaps3|41778|estExt_gwp_gw1.C_chr_90207	224006798	2	2	2	2	3	3	2	2	0.7	0.187		11	6		K01939	X
P3TCK_04826: carbamate kinase	jgi|Thaps3|3057|fgenesh1_pg.C_chr_2001012	223995861	0	0	0	0	0	1	1	0	1.399	0.583		0	6		K00926		X
pyruvate dehydrogenase (lipoamide) beta	jgi|Thaps3|8778|fgenesh1_pg.C_chr_11a000164	224013552	6	4	8	8	2	4	2	2	13.059	-0.722	YES	5	6	-0.722	K00162												X
SHM1 (SERINE HYDROXYMETHYLTRANSFERASE 1); glycine hydroxymethyltransferase	jgi|Thaps3|269942|estExt_thaps1_ua_kg.C_chr_180031	209583588	4	5	8	9	2	3	3	2	11.019	-0.823	YES	8	6	-0.823	K00600				X
Adenylosuccinate lyase.	jgi|Thaps3_bd|1515|estExt_Genewise1.C_bd_13x10001	224015397	1	1	1	1	2	3	3	2	2.094	0.603		0	5		E4.3.2.2	X
hypothetical protein AN1993.2	jgi|Thaps3|269248|estExt_thaps1_ua_kg.C_chr_70151	209586230	2	1	1	1	2	3	2	2	1.142	0.4		3	5		K00813	X	X	X						X
3nd Hit:putative dehydrogenase, E1 component, beta subunit	jgi|Thaps3|41005|estExt_gwp_gw1.C_chr_60239	224003529	2	1	1	1	3	2	5	1	1.346	0.506		0	5		E1.2.4.1												X
acyl-Coenzyme A dehydrogenase, C-2 to C-3 short chain	jgi|Thaps3|35710|e_gw1.7.167.1	209586373	0	0	0	0	1	1	1	0	1.427	0.771		0	5		K00248												X
mitochondrial glycine decarboxylase T-protein	jgi|Thaps3|36208|e_gw1.9.80.1	224006530	2	1	1	1	2	3	3	3	1.706	0.57		0	5		K00605				X
L-3-hydroxyacyl-CoA dehydrogenase subunit precursor	jgi|Thaps3|11182|fgenesh1_pg.C_chr_19a_19000125	224014766	1	0	0	0	2	2	1	3	1.693	1.025		2	5		K00022							X			X
aromatic amino acid family biosynthesis-related protein	jgi|Thaps3|268552|estExt_thaps1_ua_kg.C_chr_30309	223998716	0	0	0	0	1	1	0	0	1.202	0.582		0	5		K00014								X	X
3nd Hit:hypothetical protein AN1993.2	jgi|Thaps3|31424|e_gw1.1.326.1	223993013	3	1	2	2	2	3	4	3	0.96	0.308		0	4		K00813	X	X	X						X
hypothetical protein DDB0186738	jgi|Thaps3|412|fgenesh1_pm.C_chr_4000053	224000463	1	1	1	1	1	1	2	2	0.846	0.252		2	4		K00814	X
hypothetical protein DDB0187034	jgi|Thaps3|24521|estExt_fgenesh1_pg.C_chr_120227	224008182	-	-	-	-	-	-	-	-	-	-		3	4		K00820	X
Pyrroline-5-carboxylate reductase.	jgi|Thaps3_bd|1487|estExt_Genewise1.C_bd_6x460011	224015258	1	0	1	1	1	3	3	0	1.039	0.498		5	4		E1.5.1.2		X
Aspartate-semialdehyde dehydrogenase, USG-1 related	jgi|Thaps3|32577|e_gw1.3.377.1	223997516	1	1	0	0	3	6	3	5	10.606	1.362	YES	2	4	1.362	K00133			X	X		X
amino acid binding / aspartate kinase	jgi|Thaps3|263424|thaps1_ua_kg.chr_8000100		0	1	0	0	0	0	0	1	0.82	0.052		0	4		K00928			X	X		X
Sde_1332: Phosphoserine transaminase	jgi|Thaps3|3018|fgenesh1_pg.C_chr_2000973	223995825	2	2	1	2	3	3	1	1	0.701	0.069		10	4		K00831				X
homoserine kinase, putative	jgi|Thaps3|28592|estExt_Genewise1.C_chr_60224	224003497	1	2	2	2	2	2	2	0	0.637	-0.145		5	4		K00872				X
D-lactate dehydrogenase	jgi|Thaps3|33104|e_gw1.3.420.1	223998308	0	0	1	1	1	2	0	0	1.032	0.17		0	4		K03778				X
chloroplast beta-keto acyl reductase	jgi|Thaps3|22650|estExt_fgenesh1_pg.C_chr_50280	224001008	1	0	1	1	0	0	0	0	1.096	-0.786		6	4		K10251				X
oxidoreductase, acting on the aldehyde or oxo group of donors, disulfide as acceptor / oxoglutarate dehydrogenase (succinyl-transferring)	jgi|Thaps3|269718|estExt_thaps1_ua_kg.C_chr_130136	224009017	0	1	1	2	1	0	2	1	0.649	0.003		4	4		K00164							X			X
Mov34-1; Flagellar motor switch protein FliG-like	jgi|Thaps3|33725|e_gw1.4.430.1	223999663	0	0	0	0	0	1	0	0	1.06	0.321		2	4		K03030							X
3-phosphoshikimate 1-carboxyvinyltransferase	jgi|Thaps3|33008|e_gw1.3.187.1		0	0	0	0	0	0	0	0	1	-0.002		0	4		K00800								X	X
putative aspartate aminotransferase	jgi|Thaps3|12030|fgenesh1_pg.C_chr_23000058	224012992	0	0	0	0	1	0	1	0	1.31	0.57		0	3		K00812	X	X	X						X
COG0060: Isoleucyl-tRNA synthetase	jgi|Thaps3|26726|estExt_Genewise1.C_chr_10542	223993195	0	0	0	0	2	1	1	1	1.71	1.032		0	3		K01870												X
branched chain amino acid aminotransferase	jgi|Thaps3|39941|estExt_gwp_gw1.C_chr_30385		0	0	0	0	0	0	0	1	1.012	0.334		0	3		K00826												X
acetyl-Coenzyme A acyltransferase 2 (mitochondrial 3-oxoacyl-Coenzyme A thiolase)	jgi|Thaps3|34809|e_gw1.6.273.1	224003771									Identified only in PAcIFIC analysis			0	3		K07508												X
PREDICTED: similar to methylmalonyl-CoA mutase	jgi|Thaps3|33685|e_gw1.4.70.1	224000411									Identified only in PAcIFIC analysis			0	3		K01848												X
COG1171: Threonine dehydratase	jgi|Thaps3|42074|estExt_gwp_gw1.C_chr_120078	224008394	0	0	0	0	0	0	0	0	1	-0.002		0	3		K01754				X								X
probable phosphoribosyl-amp cyclohydrolase [Thalassiosira pseudonana CCMP1335]	jgi|Thaps3|268256|estExt_thaps1_ua_kg.C_chr_20182	223995203									Identified only in PAcIFIC analysis			0	3		K01496					X
HpaII tiny fragments locus 9C	jgi|Thaps3|269917|estExt_thaps1_ua_kg.C_chr_170057	224010878									Identified only in PAcIFIC analysis			0	3		E2.1.1.-					X					X
unnamed protein product	jgi|Thaps3|36971|e_gw1.12.76.1	224008552	2	2	1	1	1	3	1	0	0.612	-0.132		0	3		K00658							X
Isoflavone reductase	jgi|Thaps3|268474|estExt_thaps1_ua_kg.C_chr_30165		1	1	3	1	1	0	1	0	1.005	-0.617		5	3		E1.3.1.-										X
Shikimate kinase	jgi|Thaps3|263554|thaps1_ua_kg.chr_9000082		0	0	0	0	0	0	1	0	0.985	0.335		0	3		K00891								X	X
chorismate synthase	jgi|Thaps3|38964|estExt_gwp_gw1.C_chr_10077		0	0	0	0	0	0	0	0	1	-0.002		0	3		K01736								X	X
dehydroquinate synthase	jgi|Thaps3|4524|fgenesh1_pg.C_chr_4000474		0	0	0	0	0	0	0	0	1	-0.002		0	3		K01735								X	X
indole-3-glycerol phosphate synthase	jgi|Thaps3|269624|estExt_thaps1_ua_kg.C_chr_120058										Identified only in PAcIFIC analysis			0	3		E4.1.1.48								X	X
Hypothetical protein CBG12912	jgi|Thaps3|4455|fgenesh1_pg.C_chr_4000405	224000227	0	0	0	0	2	1	1	1	1.71	1.032		0	3		E6.3.2.-										X
putative leucine dehydrogenase	jgi|Thaps3|269985|estExt_thaps1_ua_kg.C_chr_19a_190048	224014840									Identified only in PAcIFIC analysis			0	2		K00263	X	X
putative prolyl 4-hydroxylase, alpha subunit	jgi|Thaps3|264177|thaps1_ua_kg.chr_14000084	224009604									Identified only in PAcIFIC analysis			0	2		E1.14.11.2		X
hypothetical protein DDB0187790	jgi|Thaps3|31777|e_gw1.2.146.1	223996785									Identified only in PAcIFIC analysis			0	2		K01028												X
cystathione gamma lyase, putative	jgi|Thaps3|9830|fgenesh1_pg.C_chr_14000175	224009944	2	3	3	2	1	2	3	2	0.62	-0.171		4	2		K01758			X
chloroplast phytoene synthase	jgi|Thaps3|268908|estExt_thaps1_ua_kg.C_chr_50183										Identified only in PAcIFIC analysis			0	2		K02291			X							X
S-adenosyl methionine synthetase	jgi|Thaps3|39946|estExt_gwp_gw1.C_chr_30390	223998422	0	0	0	0	0	0	0	0	1	-0.002		2	2		K00789			X
soluble pyridine nucleotide transhydrogenase	jgi|Thaps3|268657|estExt_thaps1_ua_kg.C_chr_40127	224000091	0	0	0	0	1	2	2	1	1.71	1.138		0	2		E1.8.1.4				X								X
glycine cleavage T-protein (aminomethyltransferase) [Synechococcus sp. PCC 7002]	jgi|Thaps3|21799|estExt_fgenesh1_pg.C_chr_30468	223998388									Identified only in PAcIFIC analysis			0	2		E2.1.2.10				X
aminomethyltransferase	jgi|Thaps3|24510|estExt_fgenesh1_pg.C_chr_120209	224008166	0	0	0	0	0	0	0	0	1	-0.002		2	2		K06980				X
3nd Hit:short-chain alcohol dehydrogenase-like protein	jgi|Thaps3|262674|thaps1_ua_kg.chr_5000313	224001600	0	0	0	0	0	0	0	0	1	-0.002		2	2		E1.1.1.-				X
ATP phosphoribosyltransferase	jgi|Thaps3|41178|estExt_gwp_gw1.C_chr_60543	224003855	0	0	0	0	2	0	1	1	1.847	0.899		0	2		K00765					X
PREDICTED: retinoblastoma binding protein 4	jgi|Thaps3|42508|estExt_gwp_gw1.C_chr_150090	224010543	0	0	0	0	1	0	1	0	1.31	0.57		0	2		E2.3.1.-					X		X				X
hypothetical protein DDB0187422	jgi|Thaps3|24429|estExt_fgenesh1_pg.C_chr_120050	224008360									Identified only in PAcIFIC analysis			0	2		K00599					X					X
3nd Hit:putative auxin-amidohydrolase precursor	jgi|Thaps3|269541|estExt_thaps1_ua_kg.C_chr_100131	224007949	0	0	0	0	1	0	1	2	1.283	0.863		0	2		K01463						X
signal peptidase	jgi|Thaps3|9852|fgenesh1_pg.C_chr_14000197	224009968	1	1	1	0	1	2	1	1	0.869	0.28		0	2		K01423							X
oxidoreductase	jgi|Thaps3|261126|thaps1_ua_kg.chr_1000386	223993483									Identified only in PAcIFIC analysis			0	2		E1.4.99.1
Prephenate dehydrogenase; NADP oxidoreductase, coenzyme F420-dependent	jgi|Thaps3|6264|fgenesh1_pg.C_chr_6000419	224003655									Identified only in PAcIFIC analysis			0	2		E1.3.1.13								X	X
chorismate mutase	jgi|Thaps3|27564|estExt_Genewise1.C_chr_30528	223997580									Identified only in PAcIFIC analysis			0	2		K01850								X	X
Prephenate dehydratase with ACT region	jgi|Thaps3|260885|thaps1_ua_kg.chr_1000145	223994081	0	0	0	1	0	0	0	0	1.063	-0.321		2	2		K04518								X	X
unnamed protein product	jgi|Thaps3|23315|estExt_fgenesh1_pg.C_chr_60726	224003167	0	0	0	0	0	1	0	0	1.06	0.321		0	2		E6.3.2.-										X
3nd Hit:PREDICTED: similar to microtubule-associated protein 6	jgi|Thaps3|9963|fgenesh1_pg.C_chr_14000308	224009720									Identified only in PAcIFIC analysis			2	2		E6.3.2.-										X
acetolactate synthase	jgi|Thaps3|35164|e_gw1.6.74.1		0	0	0	0	0	1	0	1	1.327	0.584		2	1		K01652												X
peptide deformylase	jgi|Thaps3|30977|e_gw1.1.591.1	223994725	0	0	0	0	1	2	1	0	1.66	0.884		0	1		K01462			X
peptide deformylase	jgi|Thaps3|38025|e_gw1.18.119.1	209583596									Identified only in PAcIFIC analysis			0	1		K01462			X
PREDICTED: similar to ENSANGP00000010062	jgi|Thaps3|9793|fgenesh1_pg.C_chr_14000138	224009542									Identified only in PAcIFIC analysis			0	1		K00100				X
signal peptidase	jgi|Thaps3|23402|estExt_fgenesh1_pg.C_chr_70196	209585788									Identified only in PAcIFIC analysis			0	1		E3.4.-.-							X
Glutaryl-Coenzyme A dehydrogenase	jgi|Thaps3|23830|estExt_fgenesh1_pg.C_chr_80383	224006279									Identified only in PAcIFIC analysis			0	1		K00252							X			X
indole-3-glycerol phosphate synthase	jgi|Thaps3|264407|thaps1_ua_kg.chr_17000005	224010730									Identified only in PAcIFIC analysis			0	1		K01609								X	X
hypothetical protein Saro_0392	jgi|Thaps3|20577|estExt_fgenesh1_pg.C_chr_10032	223992531	2	1	1	0	3	2	3	1	0.999	0.513		0	1		E6.3.2.-										X
CYP97B3; heme binding / iron ion binding / monooxygenase/ oxygen binding	jgi|Thaps3|264039|thaps1_ua_kg.chr_13000087	224009291	1	1	1	0	2	1	1	0	0.865	0.143		3	1		E1.14.-.-										X
aminocarboxymuconate-semialdehyde decarboxylase/ hydrolase	jgi|Thaps3|6209|fgenesh1_pg.C_chr_6000364	224002821									Identified only in PAcIFIC analysis			0	1		E4.1.1.45										X
Aminotransferase, class V	jgi|Thaps3|22208|estExt_fgenesh1_pg.C_chr_40319	223999211	0	0	0	0	0	0	0	0	1	-0.002		0	0		K00839	X			X
aspartoacylase	jgi|Thaps3|264717|thaps1_ua_kg.chr_20000058	224011918	0	0	0	0	0	0	0	0	1	-0.002		0	0		K01437	X				X
5th Best Hit: Procollagen-proline,2-oxoglutarate-4-dioxygenase	jgi|Thaps3|270017|estExt_thaps1_ua_kg.C_chr_200016	224011808	0	0	0	0	0	0	0	0	1	-0.002		0	0		E1.14.11.2		X
hypothetical protein UM04939.1	jgi|Thaps3|35561|e_gw1.7.261.1	209586149	0	0	0	0	0	0	0	0	1	-0.002		2	0		K01476		X
dehydroascorbate reductase	jgi|Thaps3|23356|estExt_fgenesh1_pg.C_chr_70084	209585734	0	0	0	0	2	2	1	1	2.166	1.132		0	0		K01873												X
2-isopropylmalate synthase/homocitrate synthase	jgi|Thaps3|29183|estExt_Genewise1.C_chr_80194	224005721	0	0	0	0	0	0	0	0	1	-0.002		0	0		K01649												X
Geraniol degradation protein	jgi|Thaps3|6524|fgenesh1_pg.C_chr_6000679	224015929	-	-	-	-	-	-	-	-	-	-		0	0		E1.3.99.-												X
Geraniol degradation protein	jgi|Thaps3_bd|1474|e_gw1.37x91.1.1	224015929	-	-	-	-	-	-	-	-	-	-		0	0		E1.3.99.-												X
hadhb: mitochondrial trifunctional protein, beta subunit	jgi|Thaps3|3627|fgenesh1_pg.C_chr_3000561	223997500	1	0	1	0	1	0	2	0	0.792	0.22		0	0		K07509												X
3nd Hit:Acetyl-Coenzyme A acyltransferase 1	jgi|Thaps3|36742|e_gw1.11a.55.1	224013830	0	0	0	0	0	0	0	0	1	-0.002		2	0		K00632												X
PREDICTED: similar to CG8129-PB, isoform B	jgi|Thaps3|14147|gw1.5.152.1	224001258	0	0	0	0	0	0	0	0	1	-0.002		0	0		K01754				X								X
CbeiDRAFT_0888: 2-hydroxyacid dehydrogenase, D-isomer specific	jgi|Thaps3|2846|fgenesh1_pg.C_chr_2000801	223995643	-	-	-	-	-	-	-	-	-	-		0	0		K00058				X
glycine cleavage system protein H	jgi|Thaps3|28521|estExt_Genewise1.C_chr_60120	224003395	0	0	0	0	0	0	0	0	1	-0.002		0	0		K02437				X
oxidoreductase	jgi|Thaps3|31125|e_gw1.1.496.1	223994529	-	-	-	-	-	-	-	-	-	-		0	0		E1.1.1.-				X
Williams-Beuren syndrome critical region protein 22	jgi|Thaps3|17145|gw1.6.420.1	224003301	1	1	1	1	0	1	0	0	0.949	-0.593		0	0		K00599					X					X
2nd Hit Spb1p-like, FtsJ methylase, hypothetical protein	jgi|Thaps3|17292|gw1.3.536.1	223997678	-	-	-	-	-	-	-	-	-	-		0	0		K00599					X					X
histidinol dehydrogenase	jgi|Thaps3|269935|estExt_thaps1_ua_kg.C_chr_180019	209583569	0	0	0	0	0	1	1	1	1.463	0.757		0	0		K00013					X
Hypothetical Protein No BLAST result	jgi|Thaps3|23444|estExt_fgenesh1_pg.C_chr_70292	209586186	0	0	1	0	0	1	0	0	1.364	-0.041		0	0		E1.11.1.7
light harvesting protein	jgi|Thaps3|262313|thaps1_ua_kg.chr_4000323		2	1	1	1	2	4	3	0	1.387	0.408		2	0		E1.11.1.7
putative phosphate synthase	jgi|Thaps3|11320|fgenesh1_pg.C_chr_19c_29000006	224014972	-	-	-	-	-	-	-	-	-	-		0	0		K01626								X	X
putative phosphate synthase	gi|118411236|ref|YP_874630.1|	224014972	-	-	-	-	-	-	-	-	-	-		0	0		K01626								X	X
beta-hydroxyacyl-acp dehydratase precursor	jgi|Thaps3|34681|e_gw1.6.505.1	224003015	0	0	0	1	1	1	1	0	1.187	0.489		0	0		K02372								X	X
indole-3-glycerol-phosphate synthase	jgi|Thaps3|36525|e_gw1.10.151.1	224007843	0	0	0	0	1	0	0	0	1.01	0.331		0	0		K01817								X	X
Extensin-like region	jgi|Thaps3|24142|estExt_fgenesh1_pg.C_chr_100110	224007689	0	0	0	0	0	0	0	0	1	-0.002		0	0		E6.3.2.-										X
trpS: tryptophanyl-tRNA synthetase	jgi|Thaps3|3461|fgenesh1_pg.C_chr_3000395	223997326	0	0	0	0	0	0	0	0	1	-0.002		0	0		K01867										X
3nd Hit:Wars protein	jgi|Thaps3|43160|estExt_gwp_gw1.C_chr_240046	224013303	0	0	0	0	1	0	0	1	1.392	0.56		0	0		K01867										X
hypothetical protein	jgi|Thaps3|21370|estExt_fgenesh1_pg.C_chr_20605	223996509	0	0	0	1	0	0	0	0	1.063	-0.321		2	0		E6.3.2.-										X
dopamine beta-monooxygenase	jgi|Thaps3|22490|estExt_fgenesh1_pg.C_chr_40864	224000687	0	1	0	0	0	0	0	0	1.004	-0.342		0	0		E1.14.17.1											X
Each replicate analysis (i.e. 1, 2, 3, 4) is indicative of the summation of spectral counts for that particular protein identified in 4 gas phase fractions (GPFs). Spectral counts resulting from triplicate analytical cycles of PAcIFIC were added together to provide a final count for the PAcIFIC analysis. QSpec: In order to be considered significantly up or down regulated two criteria were met by …
